# Supplementary material for: Promising Markers of Inflammatory and Gut Dysbiosis in Patients with Post-COVID-19 Syndrome
Source: MDPI journal article supplement (doi:10.3390/jpm13060971), 2023-06-08
Supplement: s1 [file s1]

**Supplementary Tables for “Promising Markers of Inflammatory and Gut Dysbiosis in Patients with Post-COVID-19 Syndrome”**

**Table S1.** Retrospective CT scan data during acute COVID-19 (lung injury, %) and CT scan data in patients ( $n = 20$ ) after 14 days of rehabilitation.

| Patient, sex        | Retrospective CT Scan Data, Lung Injury, % | After 14 days of rehabilitation |                                |                              |                                   |                                    |
|---------------------|--------------------------------------------|---------------------------------|--------------------------------|------------------------------|-----------------------------------|------------------------------------|
|                     |                                            | Lung Injury, %                  | Lung Capacity, cm <sup>3</sup> | Lung Injury, cm <sup>3</sup> | Left Lung Injury, cm <sup>3</sup> | Right Lung Injury, cm <sup>3</sup> |
| Patient #1, female  | 20                                         | 1                               | 4512                           | 34                           | 20                                | 14                                 |
| Patient #2, female  | 25                                         | 4                               | 3607                           | 126                          | 59                                | 67                                 |
| Patient #3, male    | 40                                         | 1                               | 6153                           | 59                           | 25                                | 34                                 |
| Patient #4, female  | 25                                         | 6                               | 3229                           | 179                          | 62                                | 117                                |
| Patient #5, male    | 55                                         | 25                              | 4497                           | 1119                         | 578                               | 540                                |
| Patient #6, female  | 10                                         | 1                               | 4668                           | 40                           | 16                                | 24                                 |
| Patient #7, female  | 80                                         | 30                              | 2700                           | 783                          | 418                               | 366                                |
| Patient #8, male    | 40                                         | 2                               | 6246                           | 101                          | 53                                | 54                                 |
| Patient #9, female  | 15                                         | 13                              | 3019                           | 367                          | 246                               | 121                                |
| Patient #10, female | 25                                         | 11                              | 3759                           | 400                          | 226                               | 174                                |
| Patient #11, female | 15                                         | 12                              | 3345                           | 386                          | 175                               | 211                                |
| Patient #12, male   | 44                                         | 2                               | 6130                           | 138                          | 63                                | 76                                 |
| Patient #13, female | 54                                         | 14                              | 3531                           | 494                          | 209                               | 285                                |
| Patient #14, female | 25                                         | 1                               | 3790                           | 27                           | 18                                | 9                                  |
| Patient #15, female | 70                                         | 26                              | 3220                           | 800                          | 436                               | 364                                |
| Patient #16, female | 50                                         | 17                              | 3236                           | 521                          | 286                               | 235                                |
| Patient #17, male   | 25                                         | 8                               | 4702                           | 390                          | 265                               | 125                                |
| Patient #18, male   | 13                                         | 3                               | 8016                           | 117                          | 65                                | 52                                 |
| Patient #19, male   | 5                                          | 3                               | 4741                           | 121                          | 48                                | 73                                 |
| Patient #20, male   | 53                                         | 9                               | 5148                           | 461                          | 196                               | 265                                |
| Median, 25-75%      | 25 (18–52)                                 | 7 (2–14)                        | *                              | *                            | *                                 | *                                  |

\* Reference values, the median and IQR are different for male/female

**Table S2.** The results of the complete blood count in patients with post-COVID-19 syndrome ( $n = 39$ ) on the day of the admission for the rehabilitation. Reference values are combined for male/female, but  $n$  ( $c > RV$ ) /  $n$  ( $c < RV$ ) indicates the number of samples with a higher / lower level than the corresponding reference value taking into account the difference in the reference values for male/female.

| Parameter                                      | Reference Values | Patients on the admission ( $n = 39$ )                                      |
|------------------------------------------------|------------------|-----------------------------------------------------------------------------|
| White Blood Cell Count (WBC), $\times 10^9/L$  | 3.8–11.8         | 5.6 (5.3–6.8), 3.0–10.9<br>$n$ ( $c < RV$ ) = 1                             |
| Red Blood Cell Count (RBC), $\times 10^{12}/L$ | 3.63–5.63        | 4.59 (4.26–5.02), 3.71–5.56<br>$n$ ( $c > RV$ ) = 6                         |
| Hemoglobin (Hb), g/L                           | 109–163          | 134 (125–146), 95–169<br>$n$ ( $c > RV$ ) = 7<br>$n$ ( $c < RV$ ) = 1       |
| Haematocrit (Hct), %                           | 31.2–47.1        | 40.5 (37.7–44.1), 31.1–49.6<br>$n$ ( $c > RV$ ) = 9<br>$n$ ( $c < RV$ ) = 1 |
| Mean Cell Volume (MCV), fL                     | 75.5–95.3        | 88.6 (86.2–91.6), 62.2–96.9<br>$n$ ( $c > RV$ ) = 3<br>$n$ ( $c < RV$ ) = 1 |
| Mean Cell Hemoglobin (MCH), pg/cell            | 24.7–33.4        | 29.5 (28.4–30.3), 19.0–33.7<br>$n$ ( $c > RV$ ) = 1<br>$n$ ( $c < RV$ ) = 1 |
| Mean Cell Hemoglobin Concentration (MCHC), g/L | 323–356          | 332 (326–335), 305–348<br>$n$ ( $c < RV$ ) = 4                              |
| Red Blood Cell Distribution Width (RDW), %     | 12.3–17.7        | 14.0 (13.6–15.0), 10.2–20.7<br>$n$ ( $c > RV$ ) = 2<br>$n$ ( $c < RV$ ) = 2 |
| Platelet Count (Plt), $\times 10^9/L$          | 179–408          | 240 (200–298), 72–436<br>$n$ ( $c > RV$ ) = 1<br>$n$ ( $c < RV$ ) = 3       |
| Mean Platelet Volume (MPV), fL                 | 7.9–10.8         | 9.2 (8.4–9.9), 7.5–10.8<br>$n$ ( $c < RV$ ) = 1                             |
| Neutrophils, %                                 | 42.7–76.8        | 55.3 (51.3–61.3), 37.4–71.3<br>$n$ ( $c < RV$ ) = 2                         |
| Lymphocytes, %                                 | 16.0–45.9        | 32.4 (27.7–38.2), 18.6–48.8<br>$n$ ( $c > RV$ ) = 3                         |
| Monocytes, %                                   | 4.3–10.9         | 8.3 (7.2–9.7), 5.9–12.7<br>$n$ ( $c > RV$ ) = 3                             |
| Eosinophils, %                                 | 0.5–7.0          | 2.5 (1.6–3.6), 0.9–8.8<br>$n$ ( $c > RV$ ) = 1                              |
| Basophils, %                                   | 0.2–1.3          | 0.8 (0.6–1.0), 0.1–1.7<br>$n$ ( $c > RV$ ) = 2                              |
| Absolute Neutrophils, $\times 10^9/L$          | 1.9–8.2          | 3.3 (2.9–3.9), 1.7–6.2<br>$n$ ( $c < RV$ ) = 2                              |
| Absolute Lymphocytes, $\times 10^9/L$          | 1.1–3.1          | 1.9 (1.6–2.4), 0.8–3.5<br>$n$ ( $c > RV$ ) = 2<br>$n$ ( $c < RV$ ) = 2      |
| Absolute Monocytes, $\times 10^9/L$            | 0.2–0.9          | 0.5 (0.4–0.6), 0.3–0.8                                                      |
| Absolute Eosinophils, $\times 10^9/L$          | <0.5             | 0.2 (0.1–0.2), 0.1–0.6<br>$n$ ( $c > RV$ ) = 1                              |
| Absolute Basophils, $\times 10^9/L$            | <0.10            | 0.01 (<0.10–0.10), <0.10–0.10                                               |

|                                             |       |                                                     |
|---------------------------------------------|-------|-----------------------------------------------------|
| Erythrocyte Sedimentation Rate (ESR), mm/hr | <20.0 | 14.0 (8.0–23.5), 3.0–37.0<br><i>n</i> (c > RV) = 10 |
|---------------------------------------------|-------|-----------------------------------------------------|

**Table S3.** The results of the coagulation test in patients with post-COVID-19 syndrome (*n* = 39) on the day of the admission for the rehabilitation. *n* (c > RV) / *n* (c < RV) indicates the number of samples with a higher / lower level than the corresponding reference value.

| Parameter                                        | Reference Values | Patients on the Admission ( <i>n</i> = 39)                                    |
|--------------------------------------------------|------------------|-------------------------------------------------------------------------------|
| Prothrombin Time (PT), sec                       | 9.4–12.5         | 11.1 (10.5–11.7), 9.4–16.4<br><i>n</i> (c > RV) = 6                           |
| Prothrombin by Quik, %                           | 80–140           | 109 (85–132), 43–167<br><i>n</i> (c > RV) = 3<br><i>n</i> (c < RV) = 4        |
| International Normalised Ratio (INR)             | 0.90–1.20        | 1.03 (0.95–1.10), 0.86–1.55<br><i>n</i> (c > RV) = 5<br><i>n</i> (c < RV) = 1 |
| Fibrinogen Activity, g/L                         | 2.38–4.98        | 3.29 (2.58–3.63), 1.67–6.08<br><i>n</i> (c > RV) = 1<br>(c < RV) = 5          |
| Activated Partial Thromboplastin Time (PTT), sec | 25.0–36.5        | 29.6 (27.8–33.1), 23.3–57.0<br><i>n</i> (c > RV) = 6<br><i>n</i> (c < RV) = 2 |
| Thrombin Time (TT), sec                          | 11.0–17.8        | 17.2 (14.0–17.7), 12.1–19.6<br><i>n</i> (c > RV) = 7                          |
| D-dimer, µ/mL                                    | <0.49            | 0.22 (0.14–0.39), 0.07–1.89<br><i>n</i> (c > RV) = 5                          |

**Table S4.** The results of the blood chemistry test, the concentrations of interleukin-6 and neuronspecific enolase in patients with post-COVID-19 syndrome (*n* = 39) on the day of the admission for the rehabilitation. *n* (c > RV) / *n* (c < RV) indicates the number of samples with a higher / lower level than the corresponding reference value.

| Parameter                         | Reference Values | Patients on the Admission ( <i>n</i> = 39)                                  |
|-----------------------------------|------------------|-----------------------------------------------------------------------------|
| Bilirubin, µmol/L                 | 5.0–21.0         | 11.3 (8.5–17.0), 3.5–38.1<br><i>n</i> (c > RV) = 5<br><i>n</i> (c < RV) = 1 |
| Total Protein, g/L                | 66.0–83.0        | 69.8 (66.7–72.3), 62.1–81.2<br><i>n</i> (c < RV) = 1                        |
| Creatinine, µmol/L                | 58.0–110.0       | 86.5 (79.8–95.4), 69.3–166.0<br><i>n</i> (c > RV) = 3                       |
| Glucose, mmol/L                   | 4.1–5.9          | 5.3 (5.0–5.9), 4.1–10.5<br><i>n</i> (c > RV) = 7                            |
| Cholesterol, mmol/L               | <5.2             | 5.2 (4.2–6.1), 2.4–8.4<br><i>n</i> (c > RV) = 19                            |
| Lactate Dehydrogenase (LDH), U/L  | <247.0           | 192.9 (156.6–215.9), 131.4–306.3<br><i>n</i> (c > RV) = 4                   |
| Alanine Transaminase (ALT), U/L   | <50.0            | 18.7 (14.9–25.8), 9.2–44.5<br><i>n</i> (c > RV) = 2                         |
| Aspartate Transaminase (AST), U/L | <50.0            | 21.1 (18.7–24.1), 15.5–91.7<br><i>n</i> (c > RV) = 3                        |

|                                      |             |                                                      |
|--------------------------------------|-------------|------------------------------------------------------|
| C-Reactive Protein (CRP), mg/L       | <5.0        | 0.6 (0.1–0.9), 0.1–30.1<br>$n(c > RV) = 8$           |
| Uric acid, $\mu\text{mol/L}$         | 154.7–428.0 | 313.9 (254.0–389.3), 196.5–528.0<br>$n(c > RV) = 10$ |
| Interleukin-6 (IL-6), pg/mL          | <7.0        | 10.9 (7.9–15.0), 1.5–61.9<br>$n(c > RV) = 33$        |
| Neuron-specific Enolase (NSE), ng/mL | <16.0       | 8.0 (3.6–11.6), 0.1–23.0<br>$n(c > RV) = 3$          |

**Table S5.** The concentrations of metabolites in the serum samples of the healthy volunteers ( $n = 48$ ) and patients with post-COVID-19 syndrome ( $n = 39$ ) on the day of the admission for the rehabilitation, and the results of the Mann-Whitney U-test.  $n(c > 0.5)$  indicates the number of samples with a level above the limit of quantitation.

| Acid, $\mu\text{mol/L}$ | Healthy Volunteers ( $n = 48$ )                | Patients on the admission ( $n = 39$ )         | $p$ -Value |
|-------------------------|------------------------------------------------|------------------------------------------------|------------|
| Benzoic                 | <0.5 (<0.5–<0.5), <0.5–0.6<br>$n(c > 0.5) = 2$ | <0.5 (<0.5–<0.5), <0.5–0.8<br>$n(c > 0.5) = 7$ | -          |
| Phenylpropionic         | <0.5 (<0.5–0.5), <0.5–3.0<br>$n(c > 0.5) = 15$ | <0.5 (<0.5–0.6), <0.5–5.1<br>$n(c > 0.5) = 15$ | -          |
| Phenyllactic            | <0.5 (<0.5–<0.5), <0.5–0.7<br>$n(c > 0.5) = 2$ | not detected                                   | -          |
| 4-Hydroxybenzoic        | not detected                                   | 6.6 (4.1–8.8), 1.0–13.0<br>$n(c > 0.5) = 39$   | <0.001     |
| 4-Hydroxyphenylacetic   | <0.5 (<0.5–<0.5), <0.5–1.2<br>$n(c > 0.5) = 5$ | <0.5 (<0.5–0.5), <0.5–1.6<br>$n(c > 0.5) = 12$ | -          |
| 4-Hydroxyphenyllactic   | 1.2 (0.9–1.5), 0.7–2.5<br>$n(c > 0.5) = 48$    | 1.1 (0.9–1.3), 0.6–2.7<br>$n(c > 0.5) = 39$    | 0.166      |
| Succinic                | 4.8 (4.4–6.0), 3.3–12.4<br>$n(c > 0.5) = 48$   | 11.8 (9.0–15.0), 7.1–25.0<br>$n(c > 0.5) = 39$ | <0.001     |
| Fumaric                 | 1.3 (1.1–1.5), 0.8–2.3<br>$n(c > 0.5) = 48$    | 2.2 (1.7–2.9), 1.0–5.5<br>$n(c > 0.5) = 39$    | <0.001     |

**Table S6.** Taxonomic abundance of the gut microbiota in patients with post-COVID-19 syndrome ( $n = 39$ ) on the day of the admission for the rehabilitation.  $n(c > 10^4/10^5)$  indicates the number of samples with a level above the limit of quantitation. Reference values (RV) were obtained for the healthy volunteers without gastrointestinal complaints (age over 14 years).  $n(c > RV) / n(c < RV)$  indicates the number of samples with a higher / lower level than the corresponding reference value.

| Parameter                   | Reference Values      | Patients on the Admission ( $n = 39$ )                                                                                                                            |
|-----------------------------|-----------------------|-------------------------------------------------------------------------------------------------------------------------------------------------------------------|
| Total bacterial mass        | $10^{11}$ – $10^{13}$ | $2 \times 10^{13}$ ( $9 \times 10^{12}$ – $7 \times 10^{13}$ ), $6 \times 10^{11}$ – $4 \times 10^{15}$<br>$n(c > 10^4) = 39$<br>$n(c > RV) = 24$                 |
| <i>Lactobacillus</i> spp.   | $10^7$ – $10^8$       | $4 \times 10^7$ ( $3 \times 10^6$ – $3 \times 10^8$ ), $1 \times 10^5$ – $4 \times 10^{10}$<br>$n(c > 10^5) = 39$<br>$n(c > RV) = 13$<br>$n(c < RV) = 14$         |
| <i>Bifidobacterium</i> spp. | $10^9$ – $10^{10}$    | $3 \times 10^{10}$ ( $1 \times 10^{10}$ – $1 \times 10^{11}$ ), $2 \times 10^8$ – $3 \times 10^{12}$<br>$n(c > 10^5) = 39$<br>$n(c > RV) = 27$<br>$n(c < RV) = 2$ |
| <i>Escherichia coli</i>     | $10^6$ – $10^8$       | $2 \times 10^8$ ( $2 \times 10^7$ – $2 \times 10^9$ ), $2 \times 10^6$ – $5 \times 10^{11}$<br>$n(c > 10^5) = 39$                                                 |

|                                                                            |                    |                                                                                                                                                                   |
|----------------------------------------------------------------------------|--------------------|-------------------------------------------------------------------------------------------------------------------------------------------------------------------|
|                                                                            |                    | $n(c > RV) = 22$                                                                                                                                                  |
| <i>Bacteroides</i> spp.                                                    | $10^9$ – $10^{12}$ | $2 \times 10^{13}$ ( $9 \times 10^{12}$ – $7 \times 10^{13}$ ), $6 \times 10^{11}$ – $4 \times 10^{15}$<br>$n(c > 10^4) = 39$<br>$n(c > RV) = 37$                 |
| <i>Faecalibacterium prausnitzii</i>                                        | $10^8$ – $10^{11}$ | $9 \times 10^{10}$ ( $4 \times 10^{10}$ – $5 \times 10^{11}$ ), $1 \times 10^7$ – $5 \times 10^{13}$<br>$n(c > 10^4) = 39$<br>$n(c > RV) = 19$<br>$n(c < RV) = 1$ |
| <i>Bacteroides thetaiotaomicron</i>                                        | $>10^4$            | $5 \times 10^9$ ( $1 \times 10^8$ – $2 \times 10^{10}$ ), $4 \times 10^6$ – $4 \times 10^{11}$<br>$n(c > 10^5) = 28$                                              |
| <i>Akkermansia muciniphila</i>                                             | $<10^{11}$         | $2 \times 10^7$ ( $2 \times 10^7$ – $7 \times 10^{10}$ ), $1 \times 10^5$ – $3 \times 10^{12}$<br>$n(c > 10^5) = 7$                                               |
| <i>Enterococcus</i> spp.                                                   | $<10^8$            | $<10^5$ ( $<10^5$ – $<10^5$ ), $<10^5$ – $4 \times 10^{12}$<br>$n(c > 10^5) = 1$<br>$n(c > RV) = 1$                                                               |
| <i>Escherichia coli</i> enteropathogenic                                   | $<10^4$            | $<3 \times 10^6$ ( $5 \times 10^4$ – $5 \times 10^6$ ), $5 \times 10^4$ – $5 \times 10^6$<br>$n(c > 10^4) = 2$<br>$n(c > RV) = 2$                                 |
| <i>Candida</i> spp.                                                        | $<10^4$            | $1 \times 10^6$ ( $7 \times 10^5$ – $2 \times 10^6$ ), $1 \times 10^5$ – $3 \times 10^7$<br>$n(c > 10^4) = 5$<br>$n(c > RV) = 5$                                  |
| <i>Klebsiella oxytoca</i>                                                  | $<10^4$            | not detected                                                                                                                                                      |
| <i>Staphylococcus aureus</i>                                               | $<10^4$            | $6 \times 10^6$ ( $3 \times 10^5$ – $2 \times 10^7$ ), $2 \times 10^5$ – $5 \times 10^7$<br>$n(c > 10^4) = 11$<br>$n(c > RV) = 11$                                |
| <i>Clostridium difficile</i>                                               | not detected       | not detected                                                                                                                                                      |
| <i>Clostridium perfringens</i>                                             | not detected       | $3 \times 10^6$ ( $2 \times 10^6$ – $1 \times 10^7$ ), $2 \times 10^6$ – $1 \times 10^7$<br>$n(c > 10^5) = 3$<br>$n(c > RV) = 3$                                  |
| <i>Proteus vulgaris/mirabilis</i>                                          | $<10^4$            | $5 \times 10^6$ ( $4 \times 10^5$ – $1 \times 10^7$ ), $<10^5$ – $2 \times 10^9$<br>$n(c > 10^5) = 5$<br>$n(c > RV) = 5$                                          |
| <i>Enterobacter</i> spp.                                                   | $<10^4$            | $2 \times 10^7$ ( $3 \times 10^6$ – $2 \times 10^8$ ), $1 \times 10^5$ – $7 \times 10^{10}$<br>$n(c > 10^5) = 26$<br>$n(c > RV) = 26$                             |
| <i>Citrobacter</i> spp.                                                    | $<10^4$            | $5 \times 10^7$ ( $3 \times 10^6$ – $3 \times 10^{13}$ ), $2 \times 10^5$ – $5 \times 10^{13}$<br>$n(c > 10^5) = 4$<br>$n(c > RV) = 4$                            |
| <i>Fusobacterium nucleatum</i>                                             | not detected       | $7 \times 10^5$ ( $2 \times 10^5$ – $5 \times 10^6$ ), $1 \times 10^5$ – $1 \times 10^7$<br>$n(c > 10^5) = 7$<br>$n(c > RV) = 7$                                  |
| <i>Parvimonas micra</i>                                                    | not detected       | $2 \times 10^5$ ( $1 \times 10^5$ – $1 \times 10^6$ ), $1 \times 10^5$ – $2 \times 10^6$<br>$n(c > 10^5) = 4$<br>$n(c > RV) = 4$                                  |
| <i>Salmonella</i> spp.                                                     | not detected       | not detected                                                                                                                                                      |
| <i>Shigella</i> spp.                                                       | not detected       | not detected                                                                                                                                                      |
| <i>Bacteroides fragilis</i> / <i>Faecalibacterium prausnitzii</i><br>Ratio | 0.01–100           | 133 (75–1000) 1.14–40000<br>$n(c > RV) = 14$                                                                                                                      |
