# Supplementary material for: Promising Markers of Inflammatory and Gut Dysbiosis in Patients with Post-COVID-19 Syndrome
Source: MDPI journal article supplement (doi:10.3390/jpm13060971), 2023-06-08
Supplement: s1 [file s1]

## A Questionnaire for COVID-19 Survivors on Admission

Second name

First name

Date of Birth

Phone number

e-mail

Time of onset of symptoms of coronavirus infection (date)

Date of discharge

COVID-19 test status now

☐ Negative PCR, date of determination «\_\_ \_\_»

Date you were diagnosed with COVID-19

What symptoms of coronavirus infection were noted during the acute phase of the disease?

- ☐ Temperature (specify what was)
- ☐ Shortness of breath
- ☐ Cough
- ☐ Loss of smell (anosmia) or loss of taste (ageusia)
- ☐ General weakness
- ☐ Myalgia
- ☐ Gastrointestinal intestinal symptoms

Have you been hospitalized?

- ☐ Yes
- ☐ No

Have you been diagnosed with pneumonia?

- ☐ Yes. The result of the CT scan  before hospitalization. CT  at discharge
- ☐ No

Was there breathing support for respiratory failure?

- ☐ Yes. What and how many days?

☒ No

What is bothering you now?

Headache, dizziness?

☐ Yes

☐ No

Loss of taste and smell?

☐ Yes

☐ No

Episodes of excessive sweating, high blood pressure, palpitations, cold hands and feet?

☐ Yes

☐ No

Do you have a cough?

☐ Yes

☒ No

Do you feel short of breath, feeling short of breath at rest?

☐ Yes

☐ No

- during increased physical activity

Yes

No

Are you experiencing problems with gastrointestinal disorders?

☐ Yes

☐ No

Do you suffer from muscle pain?

☐ Yes

☐ No

Do you suffer from excessive daytime sleepiness and fatigue?

☐ Yes

☐ No

Are you concerned about sleep disorders?

☐ Yes

☐ No

Do you have memory and attention disorders?

☐ Yes

☐ No

Do you have weakness in your arms or legs that interferes with your daily activities?

☐ Yes

☐ No

Do you have numbness of the face, body, upper or lower extremities?

☐ Yes

☐ No

If your symptoms are not listed, please describe them in more detail. \_\_\_\_\_

\_\_\_\_\_  
\_\_\_\_\_  
\_\_\_\_\_  
\_\_\_\_\_

Do you have chronic diseases? \_\_\_\_\_

\_\_\_\_\_  
\_\_\_\_\_  
\_\_\_\_\_  
\_\_\_\_\_

Patient's signature \_\_\_\_\_/ \_\_\_\_\_

Specialist signature \_\_\_\_\_/ \_\_\_\_\_
